# Supplementary material
Source: PubMed Central journal article supplement (PMC3173070)
Supplement: supp_M111.258186_jbc.M111.258186-1.pdf [file supp_M111.258186_jbc.M111.258186-1.pdf]

Supplementary data:

### Crystal structure of menin reveals the binding site for Mixed Lineage Leukemia (MLL) protein

Marcelo J. Murai, Maksymilian Chruszcz, Gireesh Reddy, Jolanta Grembecka and Tomasz Cierpicki

Figure S1. MLL fragment interacts with *Nematostella* menin. Fluorescence polarization experiment demonstrating the interaction of MBM1 motif derived from MLL (residues 4-15) and *Nematostella* menin (486 residue long fragment with deletion of C-terminal unstructured region). The estimated  $K_d$  for the interaction is  $\sim 100\mu\text{M}$ . Because of relatively weak interaction the full saturation was not achieved.

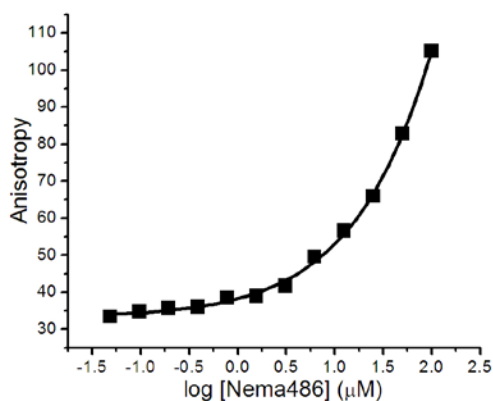

Supplementary Table 1. Thermodynamic stabilities of menin mutants determined employing thermal shift assay.

| Menin mutant | $T_m$          |
|--------------|----------------|
| WT           | $36 \pm 0.1$   |
| S155K        | $38 \pm 0.6$   |
| M278K        | $35.2 \pm 0.1$ |
| Y323K        | $37.5 \pm 0.1$ |
| E359K        | $36.1 \pm 0.1$ |
| E363K        | $39.2 \pm 0.8$ |
